# Supplementary material for: Sensing Earth and environment dynamics by telecommunication fiber-optic sensors: an urban experiment in Pennsylvania, USA
Source: Copernicus journal article supplement (doi:10.5194/se-12-219-2021), 2021-01-28
Supplement: Supplementary file 1 [file se-12-219-2021-supplement.zip]

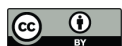

## *Supplement of*

# **Sensing Earth and environment dynamics by telecommunication fiber-optic sensors: an urban experiment in Pennsylvania, USA**

**Tieyuan Zhu et al.**

*Correspondence to:* Tieyuan Zhu (tyzhu@psu.edu)

- se-12-219-2021-supplement-title-page.pdf
- GoodMorning\_PSUDAS\_PE\_ch140\_StrainRate\_2019\_4\_26\_21143.mp4

The copyright of individual parts of the supplement might differ from the CC BY 4.0 License.
